# Supplementary material for: River hydraulic modeling with ICESat-2 land and water surface elevation
Source: Copernicus journal article supplement (doi:10.5194/hess-27-1011-2023), 2023-03-06
Supplement: Supplementary file 1 [file hess-27-1011-2023-supplement.zip]

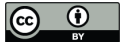

*Supplement of*

## **River hydraulic modeling with ICESat-2 land and water surface elevation**

**Monica Coppo Frias et al.**

*Correspondence to:* Monica Coppo Frias (mcfri@env.dtu.dk)

- hess-27-1011-2023-supplement-title-page.pdf
- data\_for\_charts
  - ATL13\_filter\_wse.xls
  - Calibration\_results\_dist\_n\_16.csv
  - Calibration\_results\_dist\_n\_8.csv
  - Claibration\_results\_unif\_n.csv
  - Example\_491020\_MIKE\_fig13.csv
  - Mike\_dist\_unif\_depth\_fig13.csv
  - Sim\_Q.csv
  - Sim\_Q\_SS\_solver.xls
  - Sim\_wse.csv
  - Validation\_results\_dist\_n\_16.csv
  - Validation\_results\_dist\_n\_8.csv
  - Validation\_results\_unif\_n.csv
  - WSE\_sim\_SS\_solver.xls

The copyright of individual parts of the supplement might differ from the article licence.
